# Supplementary material for: Risk of Adverse Infant Outcomes Associated with Maternal Tuberculosis in a Low Burden Setting: A Population-Based Retrospective Cohort Study
Source: Hindawi journal article supplement (doi:10.1155/2016/6413713), 2016-01-01
Supplement: f1 [file 6413713.f1.pdf]

**Supplemental Table 1.** Tuberculosis diagnoses used to identify the maternal TB exposed cohort delivering in Washington State, 1987-2012

| ICD 9 code    | Description                        | Maternal TB |        |
|---------------|------------------------------------|-------------|--------|
|               |                                    | N=134       | n (%)  |
| 10.00-18.99   | Specific TB associated ICD 9 codes |             |        |
| 11.90-11.92   | Pulmonary                          | 17          | (12.7) |
| 18.00-18.99   | Disseminated                       | 1           | (0.8)  |
| 13.00-17.99   | Extra-pulmonary                    | 6           | (4.5)  |
| 647.30-647.34 | TB in pregnancy                    | 110         | (82.1) |
